# Supplementary material
Source: publisher figshare collection journal article supplement (https://sage.figshare.com/ndownloader/files/17947823)
Supplement: Supplementary file 1 [file 17947823]

# SAGE AUTHORSHIP CHANGE REQUEST

---

## INSTRUCTIONS:

Please complete all sections of this form. We require that **all** authors (including current co-authors, those to be added and those to be removed) sign the relevant sections below. We require all signatures on the same copy of the form. Once complete, please email the form back to the sender.

---

## SECTION ONE: PAPER INFORMATION

|              |                                                                                              |                      |
|--------------|----------------------------------------------------------------------------------------------|----------------------|
| JOURNAL NAME | Perceptual and Motor Skills                                                                  |                      |
| PAPER TITLE  | Altered Visual and Proprioceptive Spatial Perception in Individuals with Parkinson's Disease | MANUSCRIPT ID NUMBER |
|              |                                                                                              | PMS-19-0085.R3       |

---

## SECTION TWO: ESSENTIAL CONDITIONS FOR CHANGE

The new author list should contain only those who can legitimately claim authorship. This is all those who:

- 1) Have made a substantial contribution to the concept or design of the article; or the acquisition, analysis, or interpretation of data for the article; AND
- 2) Drafted the article or revised it critically for important intellectual content; AND
- 3) Approved the version to be published; AND
- 4) Agreed to be accountable for all aspects of the work in ensuring that questions related to the accuracy or integrity of any part of the work are appropriately investigated and resolved.

NB: Registered authors should meet the conditions of all of the points above. All contributors who do not meet the criteria for authorship should instead be listed in an 'Acknowledgements' section.

---

## SECTION THREE: REASON FOR AUTHORSHIP CHANGE

Please provide a detailed explanation for the change in authors in the box below.

The collection of healthy individuals, as well as the production of images and tables, and help in the revision of the text was performed by Eduardo de Moura Neto and there was a lapse of the corresponding author to forget the name of this author.
